# Supplementary material
Source: PubMed Central journal article supplement (PMC6724151)
Supplement: jama-322-1085-s003.pdf [file jama-322-1085-s003.pdf]

## Supplementary Online Content

Januzzi Jr JL, Prescott MF, Butler J, et al; PROVE-HF Investigators. Association of change in N-terminal pro-B-type natriuretic peptide following initiation of sacubitril/valsartan treatment with cardiac structure and function in patients with heart failure with reduced ejection fraction. *JAMA*. doi:10.1001/jama.201912821

**eFigure 1.** Study Procedures During PROVE-HF

**eFigure 2.** Study Flow Diagram and Patient Disposition

**eFigure 3.** Boxplots Detailing Median Concentrations of Log<sub>2</sub>-NT-proBNP Across Study Visits

**eFigure 4.** Scatter Plots Demonstrating Baseline versus 12 Month Results for A) LVEF, B) LVEDVi, C) LVESVi, D) LAVi, and E) E/E'

**eTable 1.** Patient Eligibility Criteria for PROVE-HF

**eTable 2.** Median (25th, 75th Percentile) NT-proBNP Concentrations at Each Study Time Point

**eTable 3.** Correlations Between Change in Log<sub>2</sub>-NT-proBNP and Echocardiographic Measurements at 6 Months Post-enrollment

**eTable 4.** Echocardiographic Results Only in Those Subjects With Available Data From All Three Echocardiographic Examinations (Baseline, 6 Months, and 12 Months)

**eTable 5.** Adverse Events of Interest During the 12 Months of PROVE-HF

This supplementary material has been provided by the authors to give readers additional information about their work.

**eFigure 1:** Study procedures during PROVE-HF. Patients were included in the remodeling analyses if their echocardiograms were performed within  $\pm 7$  days of the 6 and 12 month follow up visit.

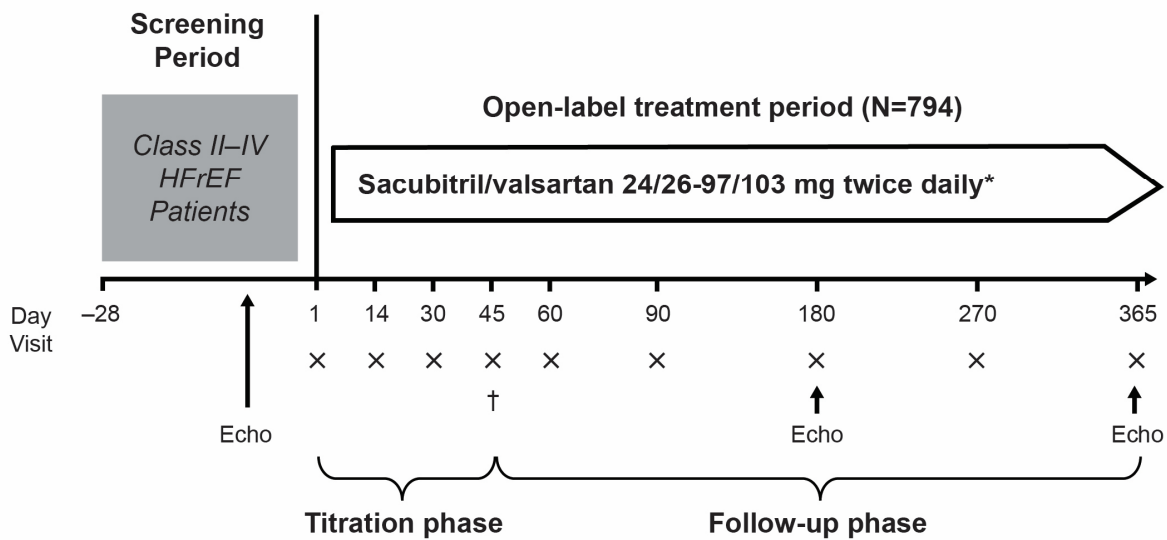

X = Vital status/events (CV death, HF hospitalization, worsening HF), physical examination, blood samples for safety chemistry and biomarkers, urine sampling, HF symptom assessment, KCCQ-23.

\* Standard HF therapy was continued throughout the study with the exception of ACEI/ARB; †At Day 45, KCCQ-23 was not administered.

CV denotes: cardiovascular; HF denotes: heart failure; KCCQ-23 denotes: Kansas City Cardiomyopathy Questionnaire-23.

**eFigure 2:** Study flow diagram and patient disposition.

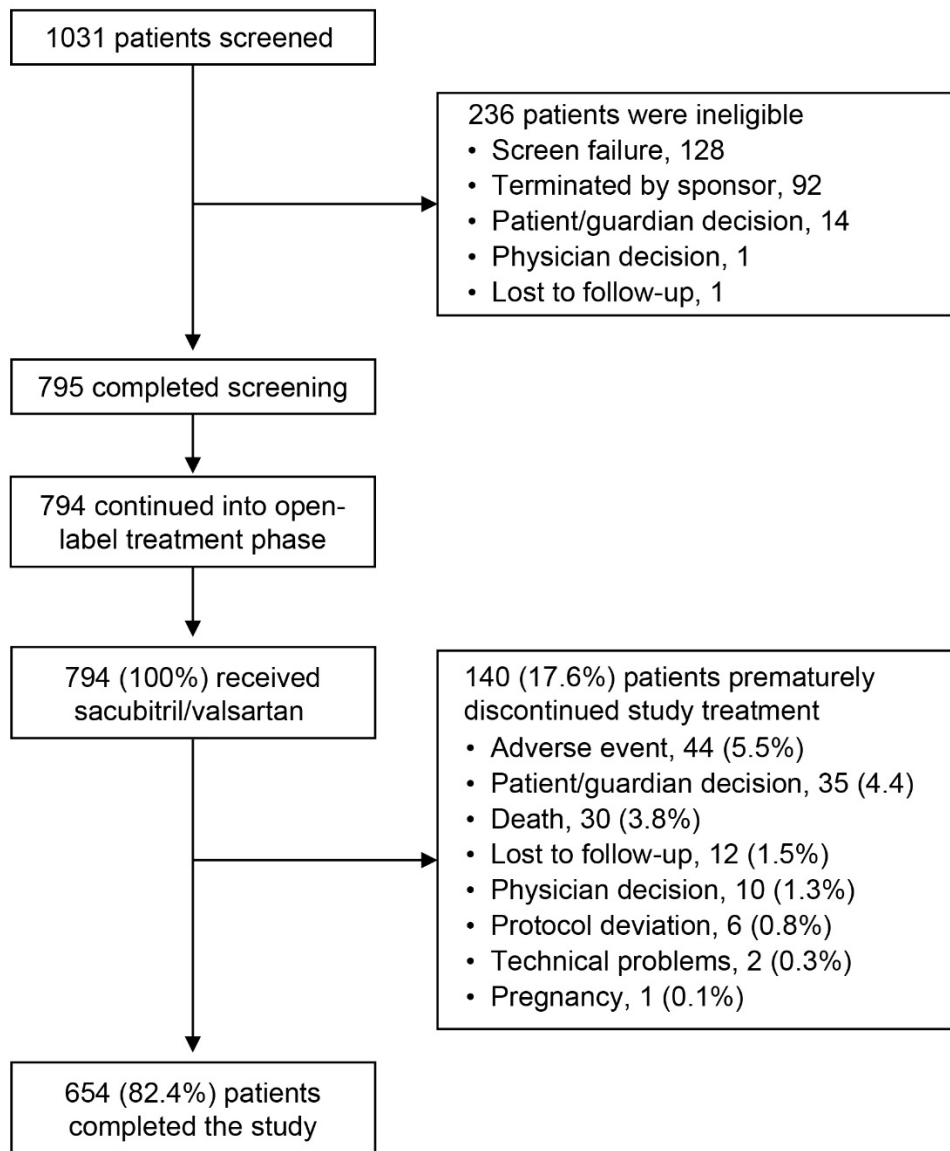

**eFigure 3:** Boxplots detailing median concentrations of log<sub>2</sub>-NT-proBNP across study visits. Boxes indicate 25<sup>th</sup>-75<sup>th</sup> percentile concentrations, whiskers identify the 5<sup>th</sup> and 95<sup>th</sup> percentiles, and open circles indicate outliers. The line identifies median values while diamonds identify mean values.

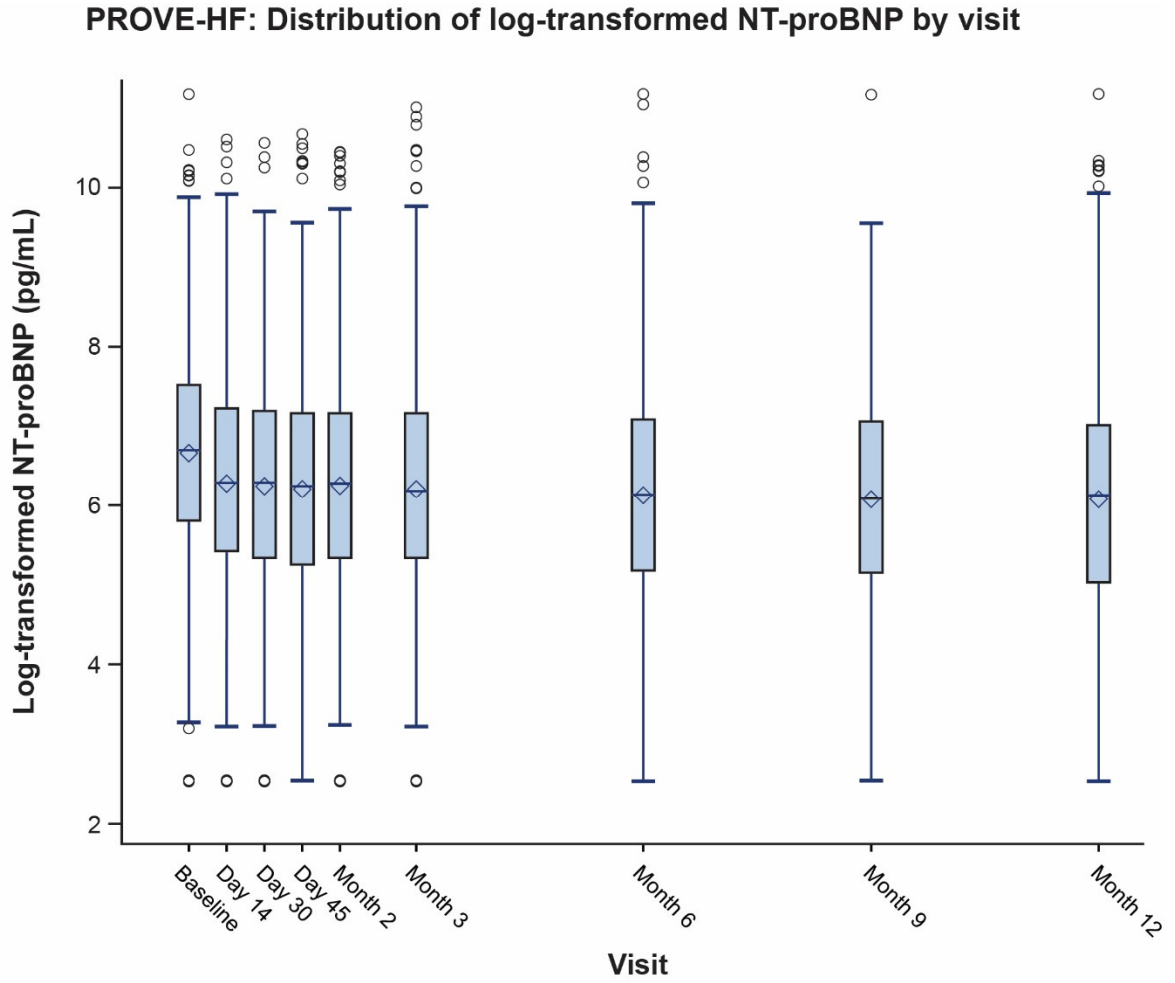

**eFigure 4:** Scatter plots demonstrating baseline versus 12 month results for A) LVEF, B) LVEDVi, C) LVESVi, D) LAVi, and E) E/E'. Improvement of cardiac performance or volumes was evident with each variable.

**A)**

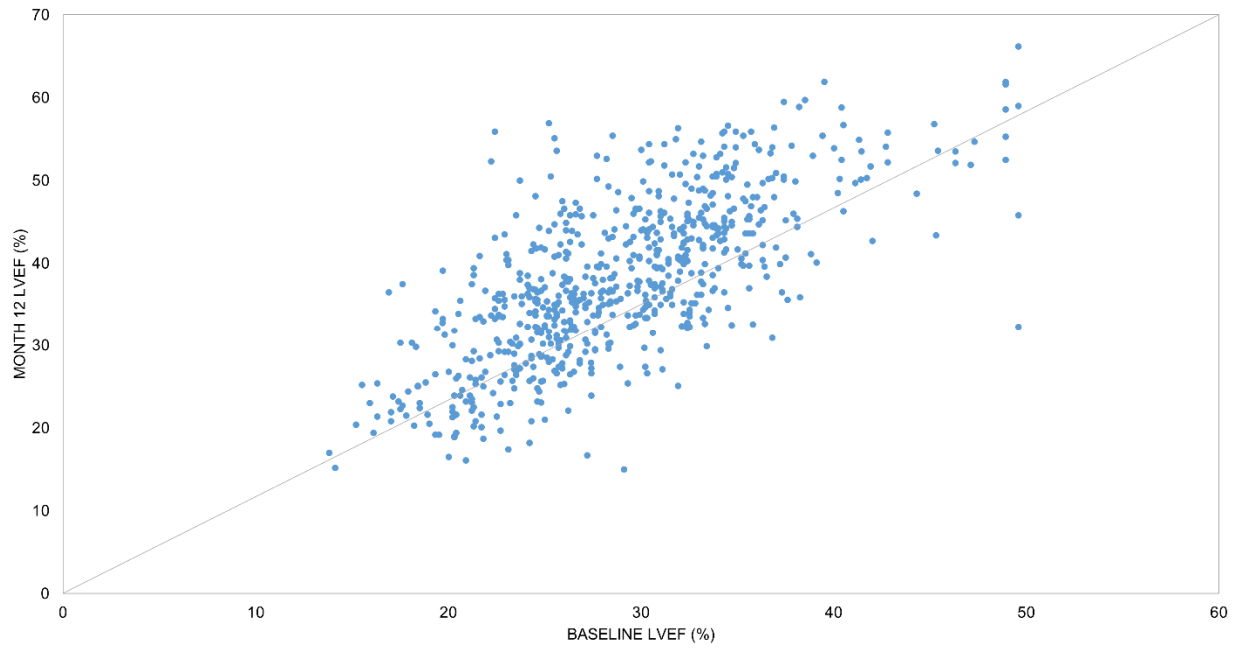

**B)**

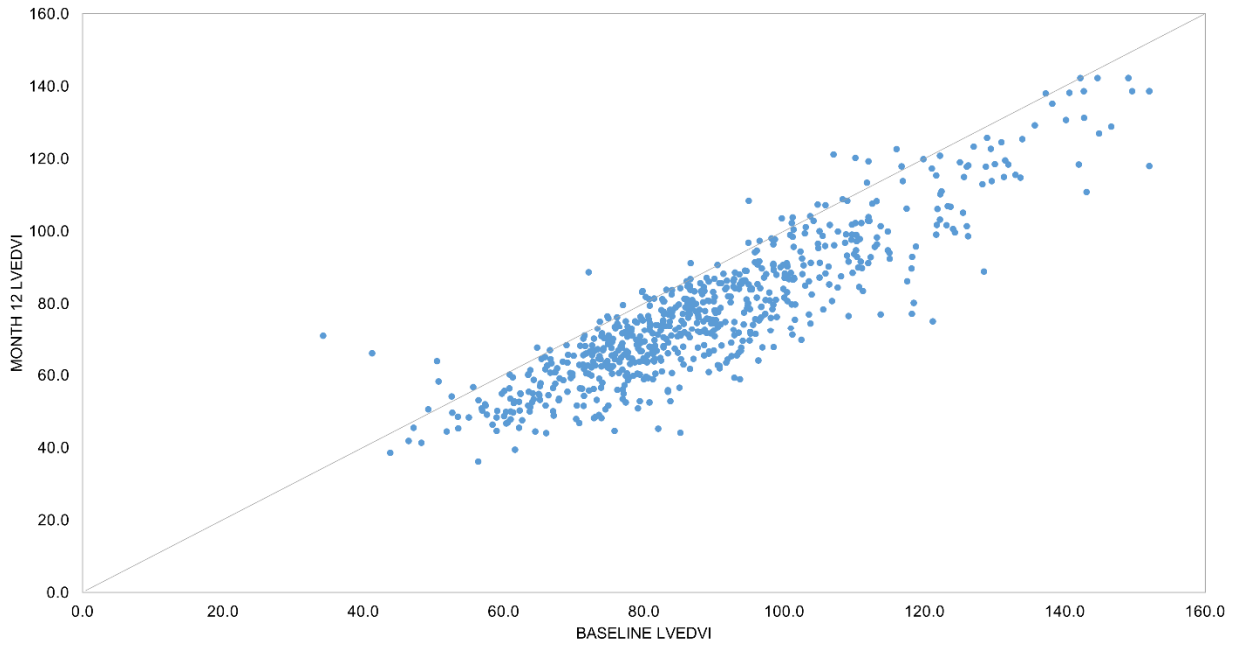

C)

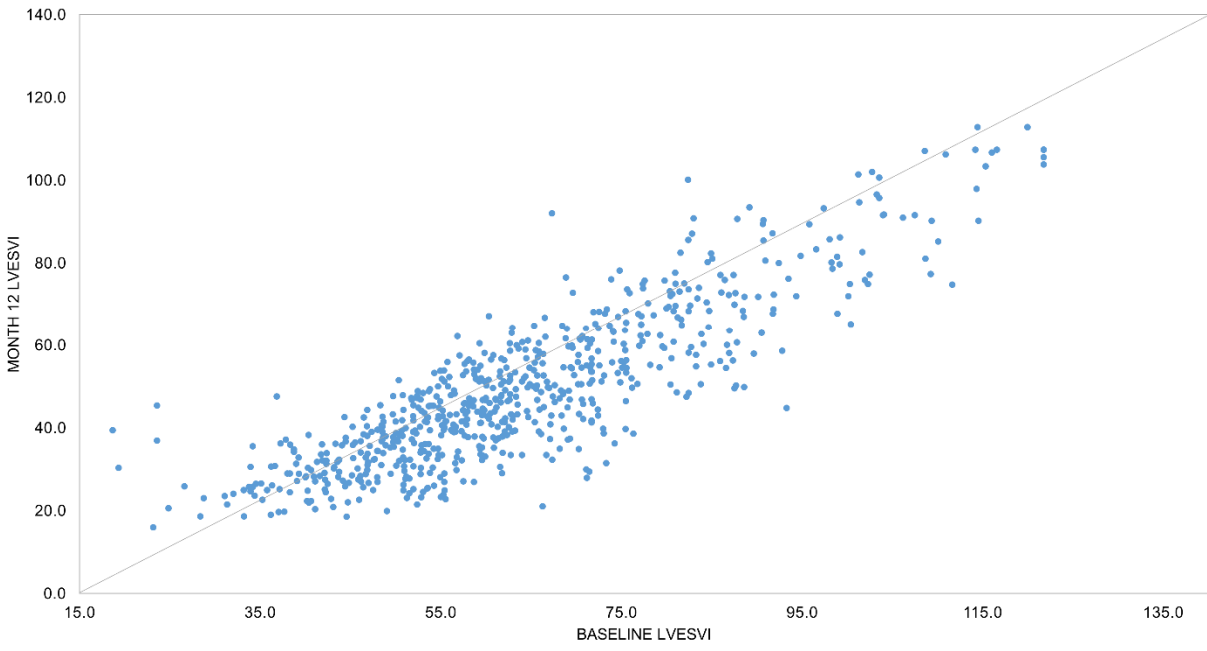

**D)**

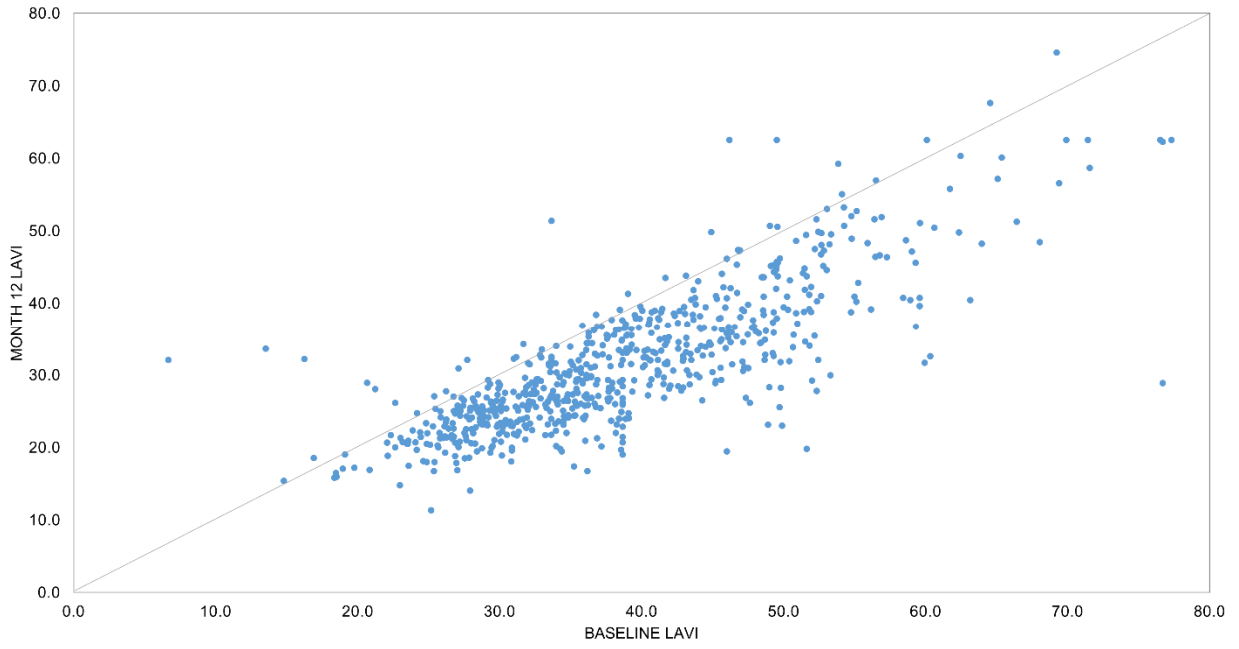



E)

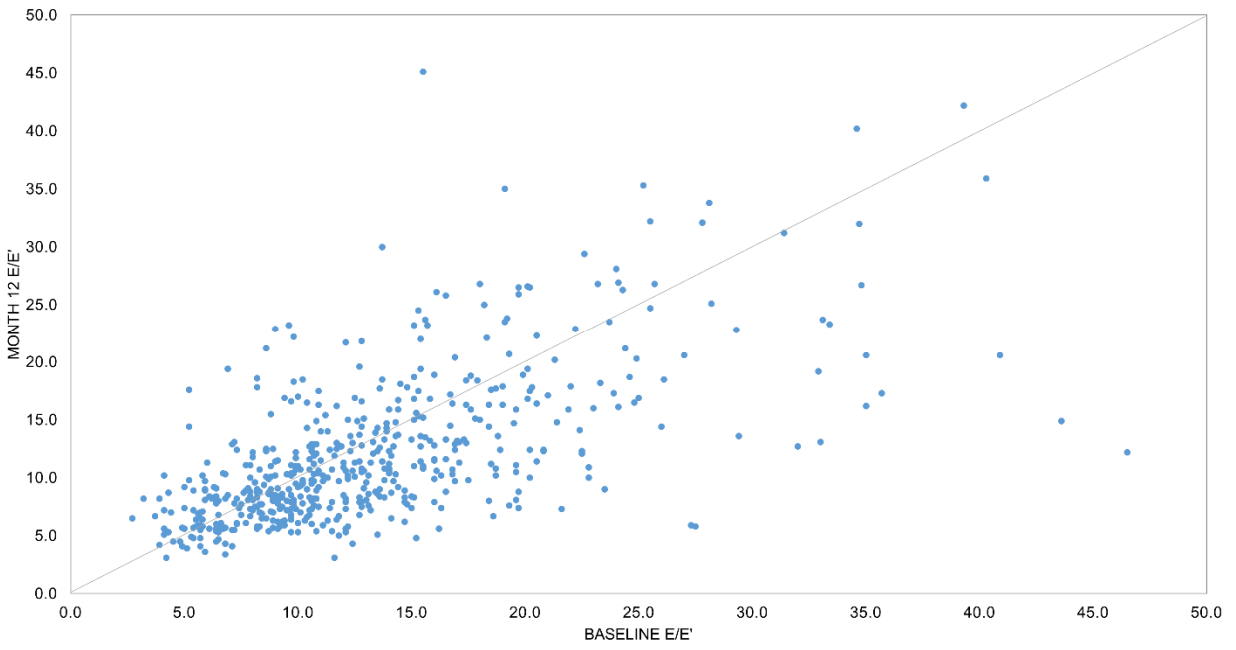

**eTable 1:** Patient eligibility criteria for PROVE-HF.

| Key Inclusion Criteria                                                                                                                                                                                                                                                                                                                                                                                                                                                                                                                                                                                                                                                                 | Key Exclusion Criteria                                                                                                                                                                                                                                                                                                                                                                                                                                                                                                                                                                                                                                                                                                                                                                                                                                                                                                                                                                                                                                                                    |
|----------------------------------------------------------------------------------------------------------------------------------------------------------------------------------------------------------------------------------------------------------------------------------------------------------------------------------------------------------------------------------------------------------------------------------------------------------------------------------------------------------------------------------------------------------------------------------------------------------------------------------------------------------------------------------------|-------------------------------------------------------------------------------------------------------------------------------------------------------------------------------------------------------------------------------------------------------------------------------------------------------------------------------------------------------------------------------------------------------------------------------------------------------------------------------------------------------------------------------------------------------------------------------------------------------------------------------------------------------------------------------------------------------------------------------------------------------------------------------------------------------------------------------------------------------------------------------------------------------------------------------------------------------------------------------------------------------------------------------------------------------------------------------------------|
| <ul style="list-style-type: none"> <li>• Aged <math>\geq 18</math> years</li> <li>• Patients with HFrEF who are candidates for on-label sacubitril/valsartan treatment per the standard of care</li> <li>• NYHA functional class II, III, or IV</li> <li>• LVEF <math>\leq 40\%</math> within the preceding 6 months according to any local measurement, and no subsequent documentation of EF <math>&gt; 40\%</math> <ul style="list-style-type: none"> <li>○ For EF measurements expressed as ranges, the average of the range endpoint values should be <math>&lt; 40\%</math></li> </ul> </li> <li>• Stable dose of loop diuretic for the 2 weeks preceding study start</li> </ul> | <ul style="list-style-type: none"> <li>• History of hypersensitivity/allergy or suspected contraindication to any study-drug component or to drugs of similar chemical classes, including ACEIs, angiotensin receptor blockers, or neprilysin inhibitors</li> <li>• Any angioedema history (drug related or otherwise)</li> <li>• Concomitant use of ACEI therapy, nesiritide, aliskiren, or drugs that may affect absorption of the study medication</li> <li>• Current or previous treatment with sacubitril/valsartan</li> <li>• Inadequate washout of other investigational drugs before study initiation</li> <li>• Enrollment in another clinical trial within 30 days of screening</li> <li>• Potassium <math>&gt; 5.2</math> mEq/L at screening</li> <li>• History of malignancy within 1 year</li> <li>• Pregnancy, lactation, or use of any method of contraception that is not highly effective</li> <li>• Implantation of CRT/D within 6 months of screening visit</li> <li>• Prior heart transplant or left ventricular assist device or intent to implant either</li> </ul> |

**eTable 2:** Median (25th, 75th percentile) NT-proBNP concentrations at each study time-point.

| Time point | N   | Median NT-proBNP<br>(25th, 75th percentile), pg/mL |
|------------|-----|----------------------------------------------------|
| Baseline   | 760 | 816 (332, 1822)                                    |
| Day 14     | 754 | 528 (226, 1378)                                    |
| Day 30     | 740 | 546 (211, 1321)                                    |
| Day 45     | 734 | 514 (192, 1297)                                    |
| Month 2    | 721 | 535 (210, 1299)                                    |
| Month 3    | 719 | 488 (211, 1315)                                    |
| Month 6    | 699 | 473 (179, 1163)                                    |
| Month 9    | 659 | 444 (170, 1153)                                    |
| Month 12   | 638 | 455 (153, 1090)                                    |

NT-proBNP denotes: amino-terminal pro-B type natriuretic peptide; pg/mL denotes: picograms per milliliter

**eTable 3:** Correlations between change in Log<sub>2</sub>-NT-proBNP and echocardiographic measurements at 6 months post-enrollment.

| Parameter                                       | N   | Pearson r (95% CI)      | P value |
|-------------------------------------------------|-----|-------------------------|---------|
| NT-proBNP (pg/mL) / LVEF (%)                    | 651 | -0.226 (-0.298, -0.152) | <.0001  |
| NT-proBNP (pg/mL) / LVEDVi (mL/m <sup>2</sup> ) | 650 | 0.164 (0.088, 0.238)    | <.0001  |
| NT-proBNP (pg/mL) / LVESVi (mL/m <sup>2</sup> ) | 650 | 0.233 (0.159, 0.305)    | <.0001  |
| NT-proBNP (pg/mL) / LAVi (mL/m <sup>2</sup> )   | 625 | 0.190 (0.113, 0.264)    | <.0001  |
| NT-proBNP (pg/mL) / E/E'                        | 495 | 0.210 (0.124, 0.292)    | <.0001  |

NT-proBNP denotes: amino-terminal pro-B type natriuretic peptide; pg/mL denotes: picograms per milliliter; LVEF denotes: left ventricular ejection fraction; LVEDVi denotes: left ventricular end-diastolic volume index; mL denotes: milliliter; LAVi denotes: left atrial volume index; E/E' denotes: ratio of early diastolic filling velocity and early diastolic mitral annular velocity.

**eTable 4:** Echocardiographic results only in those subjects with available data from all three echocardiographic examinations (baseline, 6 months, and 12 months).

| Parameter                   | N   | Baseline value, median (25 <sup>th</sup> , 75 <sup>th</sup> percentile) | LS mean change from baseline at 6 months (95% CI) | <i>P</i> value | LS mean change from baseline at 12 months (95% CI) | <i>P</i> value |
|-----------------------------|-----|-------------------------------------------------------------------------|---------------------------------------------------|----------------|----------------------------------------------------|----------------|
| LVEF (%)                    | 619 | 28.4 (24.8, 33.0)                                                       | +5.2 (+4.8, +5.6)                                 | <.0001         | +9.4 (+8.9, +10.0)                                 | <.0001         |
| LVEDVi (mL/m <sup>2</sup> ) | 618 | 86.51 (75.42, 98.76)                                                    | -6.76 (-7.24, -6.28)                              | <.0001         | -12.39 -13.08, -11.70)                             | <.0001         |
| LVESVi (mL/m <sup>2</sup> ) | 618 | 61.06 (51.69, 73.04)                                                    | -8.76 (-9.29, -8.23)                              | <.0001         | -15.41 (-16.16, -14.65)                            | <.0001         |
| LAVi (mL/m <sup>2</sup> )   | 590 | 36.78 (31.20, 45.61)                                                    | -4.36 (-4.76, -3.97)                              | <.0001         | -7.54 (-7.97, -7.11)                               | <.0001         |
| E/E'                        | 432 | 11.20 (8.45, 15.60)                                                     | -1.32 (-1.77, -0.87)                              | <.0001         | -1.35 (-1.82, -0.88)                               | <.0001         |

LS denotes: least-square; LVEF denotes: left ventricular ejection fraction; LVEDVi denotes: left ventricular end-diastolic volume index; mL denotes: milliliter; LAVi denotes: left atrial volume index; E/E' denotes: ratio of early diastolic filling velocity and early diastolic mitral annular velocity.

**eTable 5:** Adverse events of interest during the 12 months of PROVE-HF.

| Event                                                            | N = 794; n, (%) |
|------------------------------------------------------------------|-----------------|
| Hypotension (systolic blood pressure <90 mm mercury)             | 140 (17.6)      |
| Dizziness                                                        | 133 (16.8)      |
| Hyperkalemia (potassium > 5.3 milliequivalents/liter)            | 105 (13.2)      |
| Worsening kidney function*                                       | 98 (12.3)       |
| Angioedema                                                       |                 |
| No treatment or antihistamines only without hospitalization      | 2 (0.3)         |
| Use of catecholamines or glucocorticoids without hospitalization | 0               |
| Hospitalization without airway compromise                        | 0               |
| Airway compromise                                                | 0               |

\*Worsening (decrease) in estimated glomerular filtration rate of  $\geq 35\%$  from baseline, or an increase in creatinine of  $\geq 0.5$  mg/dL from baseline and a worsening (decrease) in estimated glomerular filtration rate of  $\geq 25\%$  from baseline at a given visit.
