# Supplementary material
Source: PubMed Central journal article supplement (PMC6724151)
Supplement: jama-322-1085-s004.pdf [file jama-322-1085-s004.pdf]

## Data Sharing Statement

Januzzi, Jr. Association of Change in N-Terminal Pro-B-Type Natriuretic Peptide Following Initiation of Sacubitril/Valsartan Treatment With Cardiac Structure and Function in Patients With Heart Failure With Reduced Ejection Fraction. *JAMA*. Published September 02, 2019. 10.1001/jama.2019.12821

### Data

**Data available:** No

### Additional Information

**Explanation for why data not available:** Summary data underlying the findings described in this manuscript will be available within one year after study completion, and patient-level data may be requested via <http://www.clinicalstudydatarequest.com> after the relevant clinical trial results have been accepted for publication in scientific journals, according to Novartis policies.
